# Supplementary material for: Implications of Blood Pressure Measurement Technique for Implementation of Systolic Blood Pressure Intervention Trial (SPRINT)
Source: PubMed Central journal article supplement — J Am Heart Assoc. 2017 Feb 3;6(2):e004536. doi: 10.1161/JAHA.116.004536 (PMC5523757; doi:10.1161/jaha.116.004536), 2017-02-03

# **SUPPLEMENTAL MATERIAL**

**Figure S1: Systolic BP bias and limits of agreement for 10 subgroups**

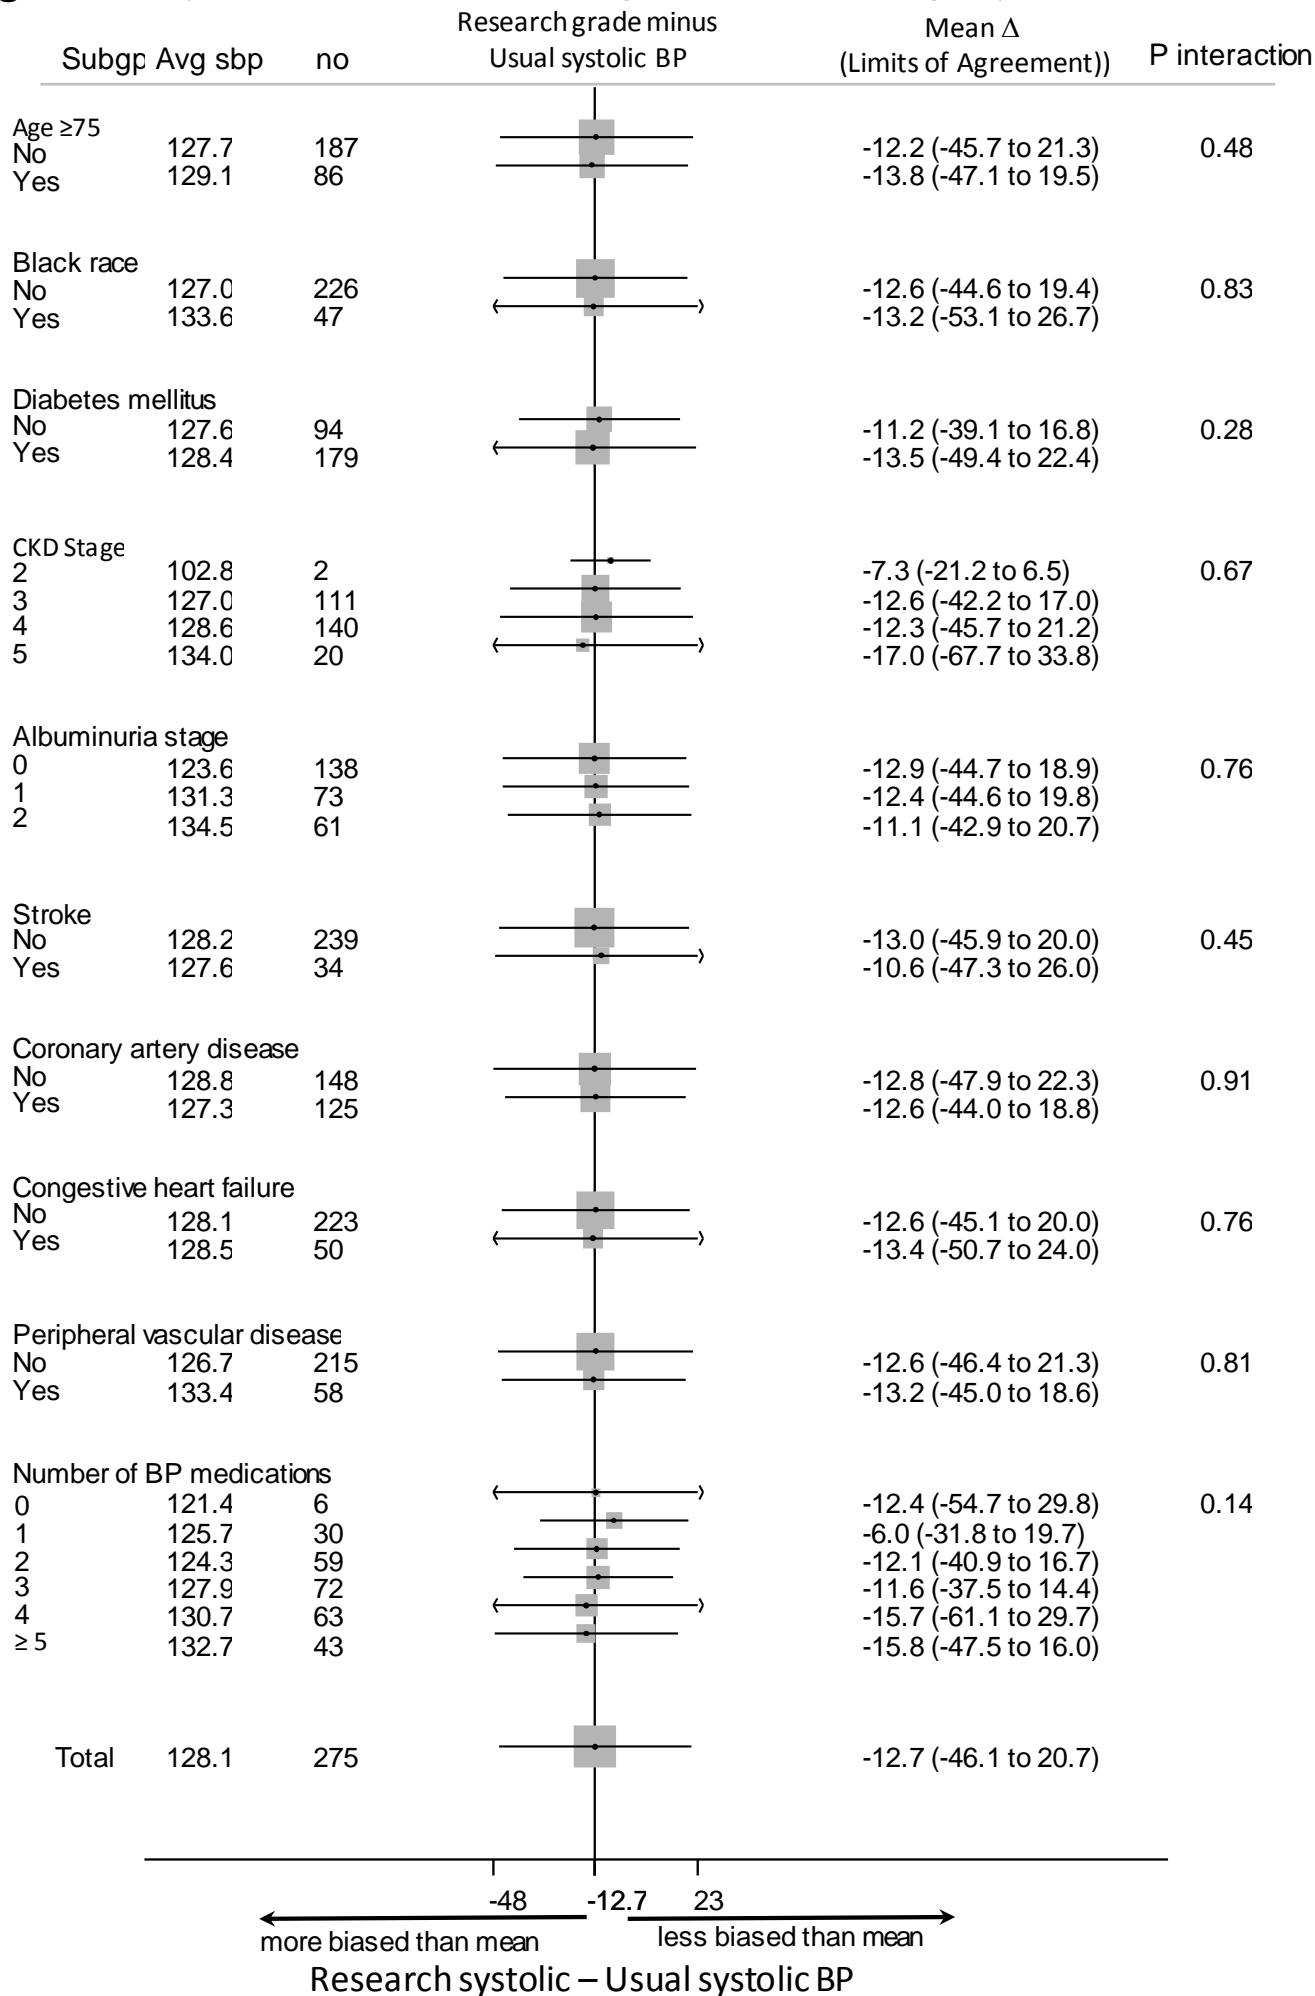

**Figure S2: Systolic BP bias between research systolic and daytime ambulatory BP and limits of agreement for 10 subgroups**

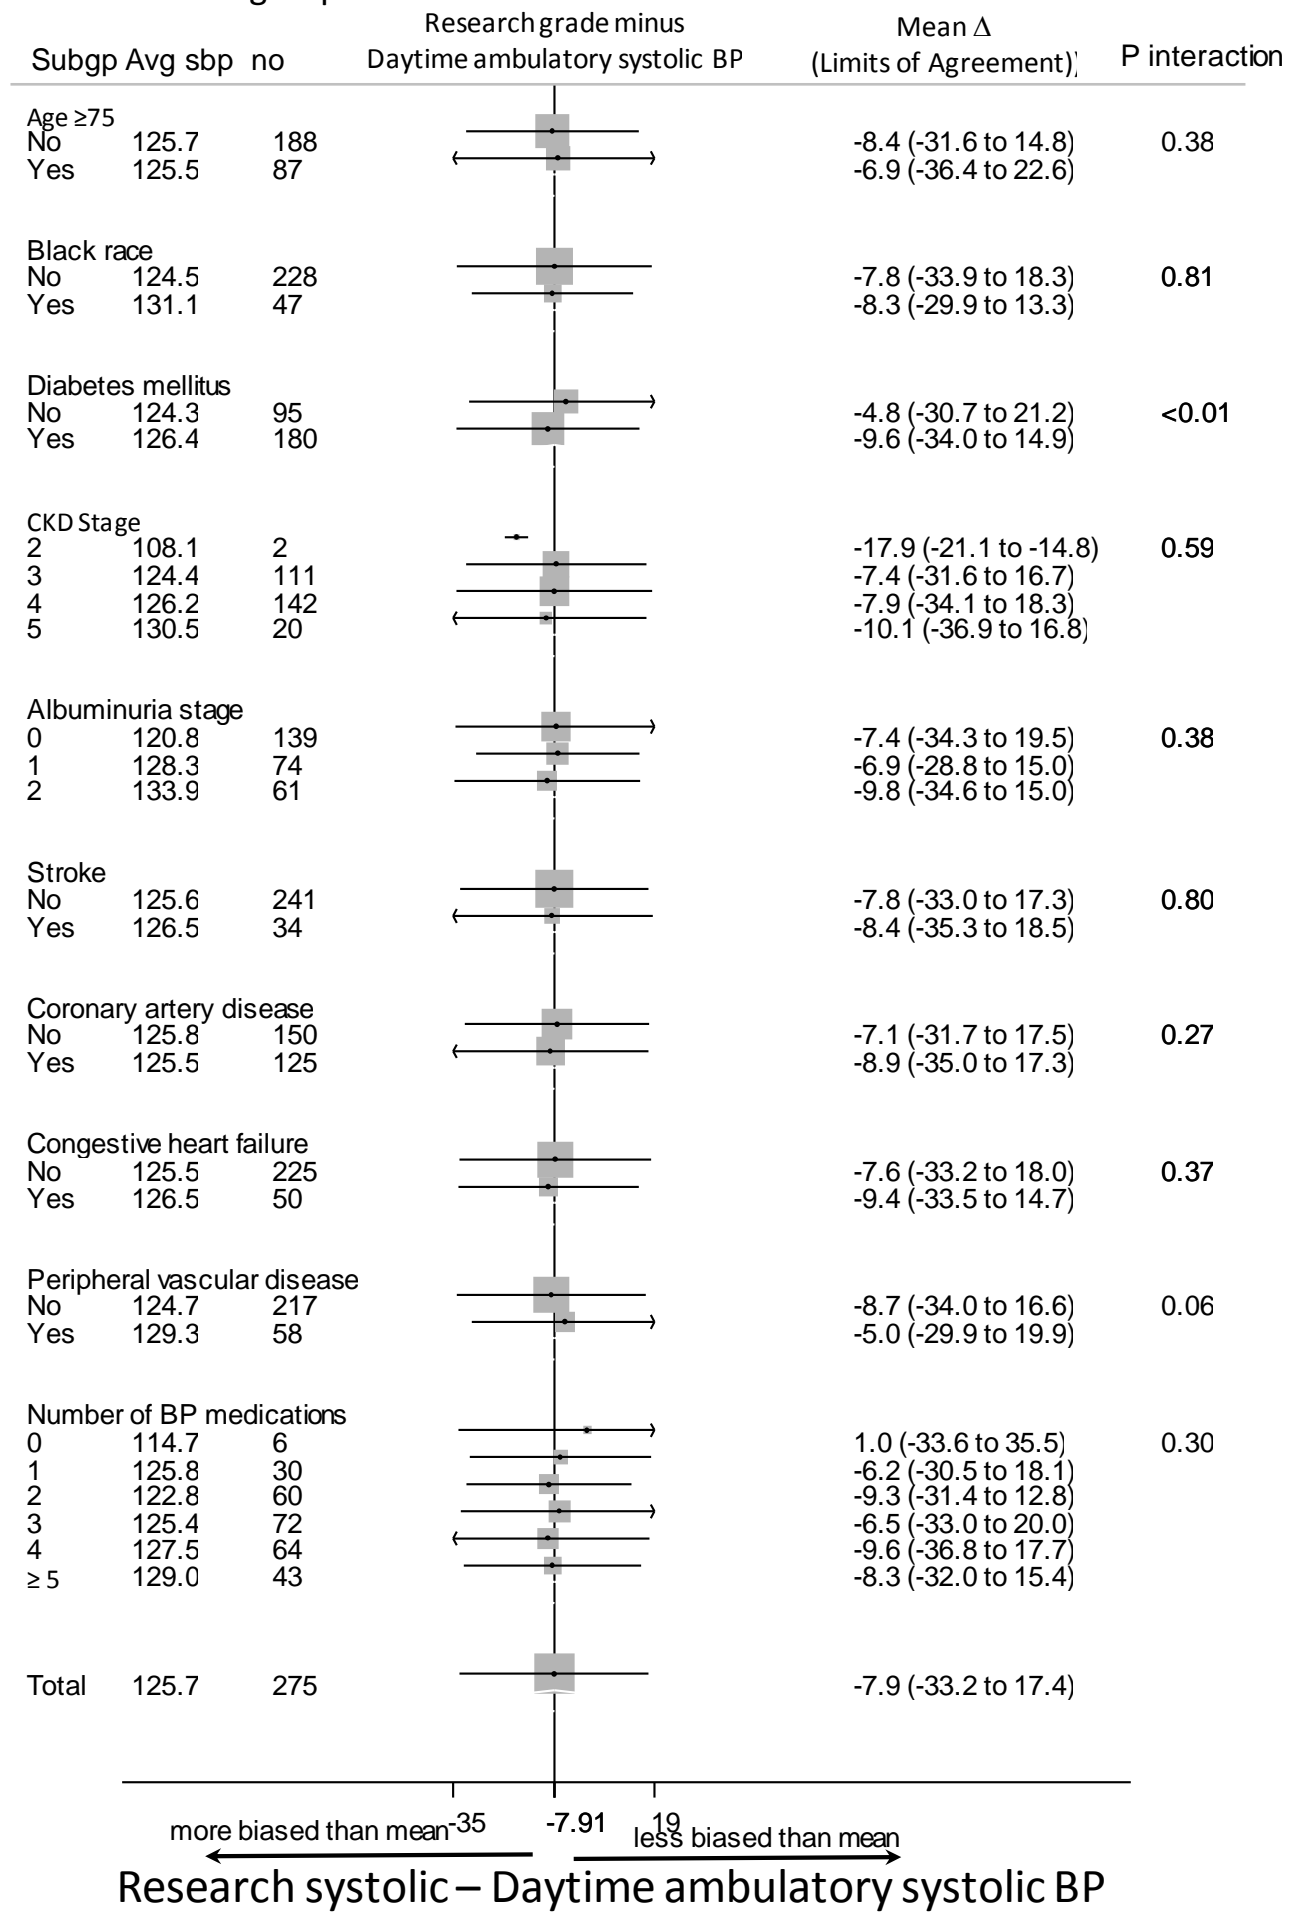

Supplement: JAH3-6-e004536-s001.pdf [file JAH3-6-e004536-s001.pdf]
